# Supplementary material
Source: publisher figshare collection journal article supplement (https://asha.figshare.com/articles/dataset/_/23699757)
Supplement: Supplementary file 1 [file 1]

## **Supplemental Material S3.** Literature review on AAC research and implementation science research in education.

### **Section 1: AAC FOCUSED REFERENCES**

- American Speech-Language Hearing Association. (2005). *Roles and responsibilities of speech language pathologists with respect to augmentative and alternative communication: Position statement*. <http://www.asha.org/docs/html/PS2005-00113.html>
- Allen, A. A., Schlosser, R. W., Brock, K. L., & Shane, H. C. (2017). The effectiveness of aided augmented input techniques for persons with developmental disabilities: A systematic review. *Augmentative and Alternative Communication*, 33(3), 149–159. <https://doi.org/10.1080/07434618.2017.1338752>
- Alzrayer, N., Banda, D. R., & Koul, R. K. (2014). Use of iPad/iPods with individuals with autism and other developmental disabilities: A meta-analysis of communication interventions. *Review Journal of Autism and Developmental Disorders*, 1(3), 179–191. <https://doi.org/10.1007/s40489-014-0018-5>
- Barker, R. M., Akaba, S., Brady, N. C., & Thiemann-Bourque, K. (2013). Support for AAC use in preschool and growth in language skills, for young children with developmental disabilities. *Augmentative and Alternative Communication*, 29, 334–346. <https://doi.org/10.3109/07434618.2013.848933>
- Barton, E. E., Pribble, L., & Chen, C. I. (2013). The use of e-mail to deliver performance-based feedback to early childhood practitioners. *Journal of Early Intervention*, 35(3), 270–297. <https://doi.org/10.1177/1053815114544543>
- Barton, A., Sevcik, R. A., & Ann Ronski, M. (2006). Exploring visual-graphic symbol acquisition by pre-school age children with developmental and language delays. *Augmentative and Alternative Communication*, 22(1), 10–20. <https://doi.org/10.1080/07434610500238206>
- Barton-Hulse, A., Wegner, J., Brady, N. C., Bunce, B. H., & Sevcik, R. A. (2017). Comparing the effects of speech-generating device display organization on symbol comprehension and use by three children with developmental delays. *American Journal of Speech-Language Pathology*, 26(2), 227–240. [https://doi.org/10.1044/2016\\_AJSLP-15-0166](https://doi.org/10.1044/2016_AJSLP-15-0166)
- Beck, A. R., Thompson, J. R., Clay, S. L., Hutchins, M., Vogt, W. P., Romaniak, B., & Sokolowski, B. (2001). Preservice professionals' attitudes toward children who use augmentative/alternative communication. *Education and Training in Mental Retardation and Developmental Disabilities*, 36(3), 255–271. <http://www.jstor.org/stable/23879979>
- Beukelman, D., Mirenda, P. (2013). *Augmentative and alternative communication: Supporting children and adults with complex communication needs* (4<sup>th</sup> ed.). Paul Brookes.
- Binger, C., Kent-Walsh, J., Berens, J., Del Campo, S., & Rivera, D. (2008). Teaching Latino parents to support the multi-symbol message productions of their children who require AAC. *Augmentative and Alternative Communication*, 24(4), 323–338. <https://doi.org/10.1080/07434610802130978>
- Binger, C., Kent-Walsh, J., Ewing, C., & Taylor, S. (2010). Teaching educational assistants to facilitate the multisymbol message productions of young students who require augmentative and alternative communication. *American Journal of Speech-Language Pathology*, 19, 108–120. [https://doi.org/10.1044/1058-0360\(2009/09-0015\)](https://doi.org/10.1044/1058-0360(2009/09-0015))

- Binger, C., Kent-Walsh, J., & King, M. (2017a). Dynamic assessment for 3- and 4-year-old children who use augmentative and alternative communication: Evaluating expressive syntax. *Journal of Speech, Language, and Hearing Research*, 60(7), 1946–1958. [https://doi.org/10.1044/2017\\_JSLHR-L-15-0269](https://doi.org/10.1044/2017_JSLHR-L-15-0269)
- Binger, C., Kent-Walsh, J., King, M., & Mansfield, L. (2017b). early sentence productions of 3- and 4-year-old children who use augmentative and alternative communication. *Journal of Speech, Language, and Hearing Research*, 60(7), 1930–1945. [https://doi.org/10.1044/2017\\_JSLHR-L-15-0408](https://doi.org/10.1044/2017_JSLHR-L-15-0408)
- Binger, C., & Light, J. (2006). Demographics of preschoolers who require AAC. *Language, Speech & Hearing Services in Schools*, 37(3), 200–208. [https://doi.org/10.1044/0161-1461\(2006/022\)](https://doi.org/10.1044/0161-1461(2006/022))
- Binger, C., & Light, J. (2007). The effect of aided AAC modeling on the expression of multi-symbol messages by preschoolers who use AAC. *Augmentative and Alternative Communication*, 23, 30–43. <https://doi.org/10.1080/074346106008074>
- Bingham, M. A., Spooner, F., & Browder, D. (2007). Training paraeducators to promote the use of augmentative and alternative communication by students with significant disabilities. *Education and Training in Developmental Disabilities*, 339–352. <http://www.jstor.org/stable/23879627>
- Bock, S. J., Stoner, J. B., Beck, A. R., Hanley, L., & Prochnow, J. (2005). Increasing functional communication in non-speaking preschool children: Comparison of PECS and VOCA. *Education and Training in Developmental Disabilities*, 264–278. <http://www.jstor.org/stable/23879720>
- Brady, N. (2000). Improved comprehension of object names following voice output communication aid use: Two case studies. *Augmentative and Alternative Communication*, 16(3), 197–204. <https://doi.org/10.1080/07434610012331279054>
- Brady, N. C., Fleming, K., Thiemann-Bourque, K., Olswang, L., Dowden, P., Saunders, M. D., & Marquis, J. (2012). Development of the communication complexity scale. *American Journal of Speech – Language Pathology* 21, 16-28. [https://doi.org/10.1044/1058-0360\(2011/10-0099\)](https://doi.org/10.1044/1058-0360(2011/10-0099))
- Brady, N. C., Herynk, J. W., & Fleming, K. (2010). Communication input matters: Lessons from prelinguistic children learning to use AAC in preschool environments. *Early Childhood Services* 4, 141–154.
- Brady, N., Skinner, D., Roberts, J., & Hennon, E. (2006). Communication in young children with fragile X syndrome: A qualitative study of mothers' perspectives. *American Journal of Speech-Language Pathology*, 15(4), 353–364. [https://doi.org/10.1044/1058-0360\(2006/033\)](https://doi.org/10.1044/1058-0360(2006/033))
- Brady, N. C., Thiemann-Bourque, K., Fleming, K., & Matthews, K. (2013). Predicting language outcomes for children learning augmentative and alternative communication: Child and environmental factors. *Journal of Speech, Language, and Hearing Research*, 56, 1595–1612. [https://doi.org/10.1044/1092-4388\(2013/12-0102\)](https://doi.org/10.1044/1092-4388(2013/12-0102))
- Branson, D. & Demchak, M. (2009). The use of augmentative and alternative communication methods with infants and toddlers with disabilities: A research review. *Augmentative and Alternative Communication*, 25, 274- 286. <https://doi.org/10.3109/07434610903384529>

- Brantlinger, E., Jimenez, R., Klingner, J., Pugach, M., & Richardson, V. (2016). Qualitative studies in special education: *Exceptional children*. <https://doi.org/10.1177/001440290507100205>
- Bruner, J.S. (1975). From communication to language: A psychological perspective. *Cognition*, 3, 255-287. [https://doi.org/10.1016/0010-0277\(74\)90012-2](https://doi.org/10.1016/0010-0277(74)90012-2)
- Calculator, S. N., & Black, T. (2009). Validation of an inventory of best practices in the provision of augmentative and alternative communication services to students with severe disabilities in general education classrooms. *American Journal of Speech-Language Pathology*, 18, 329-342. [https://doi.org/10.1044/1058-0360\(2009/08-0065\)](https://doi.org/10.1044/1058-0360(2009/08-0065))
- Campbell, P. H., Milbourne, S., Dugan, L. M., & Wilcox, M. J. (2006). A review of evidence on practices for teaching young children to use assistive technology devices. *Topics in Early Childhood Special Education*, 26(1), 3-13. <https://doi.org/10.1177/02711214060260010101>
- Chung, Y.C. & Carter, E.W. (2013). Promoting peer interactions in inclusive classrooms for students who use speech-generating devices. *Research and Practice for Persons with Severe Disabilities*, 38, 94-109 <https://doi.org/10.2511/0274948130807714492>
- Copley, J., & Ziviani, J. (2004). Barriers to the use of assistive technology for children with multiple disabilities. *Occupational Therapy International*, 11(4), 229-243. <https://doi.org/10.1002/oti.213>
- Dada, S., & Alant, E. (2009). The effect of aided language stimulation on vocabulary acquisition in children with little or no functional speech. *American Journal of Speech-Language Pathology*, 18, 50-64. [https://doi.org/10.1044/1058-0360\(2008/07-0018\)](https://doi.org/10.1044/1058-0360(2008/07-0018))
- Da Fonte, M. A., & Boesch, M. C. (2016). Recommended augmentative and alternative Communication competencies for special education teachers. *Journal of International Special Needs Education*, 19(2), 47-58. <https://doi.org/10.9782/2159-4341-19.2.47>
- Downing, J. E., Hanreddy, A., & Peckham-Hardin, K. D. (2015). *Teaching Communication Skills to Students with Severe Disabilities*, (3<sup>rd</sup> ed.). Paul Brookes.
- Douglas, S. N., Light, J. C., & McNaughton, D. B. (2013). Teaching paraeducators to support the communication of young children with complex communication needs. *Topics in Early Childhood Special Education*, 33, 91-101. <https://doi.org/10.1177/0271121412467074>
- Douglas, S. N., McNaughton, D., & Light, J. (2013). Online training for paraeducators to support the communication of young children. *Journal of Early Intervention*, 35(3), 223-242. <https://doi.org/10.1177/1053815114526782>
- Drager, K. D. R., Postal, V. J., Carrolus, L., Castellano, M., Gagliano, C., & Glynn, J. (2006). The effect of aided language modeling on symbol comprehension and production in 2 preschoolers with autism. *American Journal of Speech-Language Pathology*, 15, 112-125. [https://doi.org/10.1044/1058-0360\(2006/012\)](https://doi.org/10.1044/1058-0360(2006/012))
- Finke, E. H., Finke, E. H., McNaughton, D. B., & Drager, K. D. R. (2009). "All children can and should have the opportunity to learn": General education teachers' perspectives on including children with Autism Spectrum Disorder who require AAC. *Augmentative and Alternative Communication*, 25(2), 110-122. <https://doi.org/10.1080/07434610902886206>

- Ganz, J. B. (2007). Classroom structuring methods and strategies for children and youth with Autism Spectrum Disorders. *Exceptionality*, 15(4), 249–260. <https://doi.org/10.1080/09362830701655816>
- Ganz, J. B., Earles-vollrath, T. L., Heath, A. K., Parker, R. I., Rispoli, M. J., & Duran, J. B. (2012). A meta-analysis of single case research studies on aided augmentative and alternative communication systems with individuals with autism spectrum disorders. *Journal of Autism and Developmental Disorders*, 42(1), 60–74. <https://doi.org/10.1007/s10803-011-1212-2>
- Ganz, J. B., Kaylor, M., Bourgeois, B., & Hadden, K. (2008). The impact of social scripts and visual cues on verbal communication in three children with autism spectrum disorders. *Focus on Autism and Other Developmental Disabilities*, 23(2), 79–94. <https://doi.org/10.1177/1088357607311447>
- Ganz, J. B., Morin, K. L., Foster, M. J., Vannest, K. J., Tosun, D. G., Gregori, E. V., & Gerow, S. L. (2017). High-technology augmentative and alternative communication for individuals with intellectual and developmental disabilities and complex communication needs: A meta-analysis. *Augmentative and Alternative Communication*, 33(4), 224–238. <https://doi.org/10.1080/07434618.2017.1373855>
- Gevarter, C., & Zamora, C. (2018). Naturalistic speech-generating device interventions for children with complex communication needs: A systematic review of single-subject studies. *American Journal of Speech-Language Pathology*, 1–18. [https://doi.org/10.1044/2018\\_AJSLP-17-0128](https://doi.org/10.1044/2018_AJSLP-17-0128)
- Gosnell, J., Costello, J., & Shane, H. (2011). Using a clinical approach to answer “what communication apps should we use?” *Augmentative and Alternative Communication*, 20, 87–96. <https://doi.org/10.1044/aac20.3.87>
- Haebig, E., McDuffie, A., & Weismer, S. E. (2013). Brief report: Parent verbal responsiveness and language development in toddlers on the Autism spectrum. *Journal of Autism and Developmental Disorders*, 43, 2218–2227. <https://doi.org/10.1007/s10803-013-1763-5>
- Hajjar, D. J., McCarthy, J. W., Benigno, J. P., Montgomery, J., Chabot, J., & Boster, J. (2019). Weaving participation, interaction, and technology across recreational experiences: Perspectives from volunteers, caregivers, and people with complex communication needs. *Augmentative and Alternative Communication*, 35(3), 217–228. <https://doi.org/10.1080/07434618.2019.1597161>
- Harding, C., Lindsay, G., O'Brien, A., Dipper, L., & Wright, J. (2011). Implementing AAC with children with profound and multiple learning disabilities: A study in rationale underpinning intervention. *Journal of Research in Special Educational Needs*, 11(2), 120–129. <https://doi.org/10.1111/j.1471-3802.2010.01184.x>
- Harris, M. D. & Reichle, J. (2004). The impact of aided language stimulation on symbol comprehension and production in children with moderate cognitive disabilities. *American Journal of Speech-Language Pathology*, 13(2), 155–167. [https://doi.org/10.1044/1058-0360\(2004/016\)](https://doi.org/10.1044/1058-0360(2004/016))
- Hetzroni, O., & Belfiore, P. (2000). Preschoolers with communication impairments play shrinking Kim: An interactive computer storytelling intervention for teaching blissymbols. *Augmentative and Alternative Communication*, 16(4), 260–269. <https://doi.org/10.1080/07434610012331279114>
- Hong, E. R., Ganz, J. B., Neely, L., Gerow, S., & Ninci, J. (2016). A review of the quality of primary caregiver-implemented communication intervention research for children with

- ASD. *Research in Autism Spectrum Disorders*, 25, 122–136.  
<https://doi.org/10.1016/j.rasd.2016.02.005>
- Hustad, K. C., Keppner, K., Schanz, A., & Berg, A. (2008). Augmentative and alternative communication for preschool children: Intervention goals and use of technology. *Seminars in Speech and Language*, 29(2), 83–91. <https://doi.org/10.1055/s-2008-1080754>
- Johnston, S. S., McDonnell, A. P., Nelson, C., & Magnavito, A. (2003). Teaching functional communication skills using augmentative and alternative communication in inclusive settings. *Journal of Early Intervention*, 25(4), 263–280.  
<https://doi.org/10.1177/105381510302500403>
- Johnson Rachel K. & Prebor Jessica. (2019). Update on preservice training in augmentative and alternative communication for speech-language pathologists. *American Journal of Speech-Language Pathology*, 28(2), 536–549. [https://doi.org/10.1044/2018\\_AJSLP-18-0004](https://doi.org/10.1044/2018_AJSLP-18-0004)
- Kaiser, A. P., & Roberts, M. Y. (2013). Parent-implemented enhanced milieu teaching with preschool children who have intellectual disabilities. *Journal of Speech, Language, and Hearing Research*, 56, 295–309. [https://doi.org/10.1044/1092-4388\(2012/11-0231\)](https://doi.org/10.1044/1092-4388(2012/11-0231))
- Kasari, C., Kaiser, A., Goods, K., Nietfeld, J., Mathy, P., Landa, R., Murphy, S., & Almirall, D. (2014). Communication interventions for minimally verbal children with autism: A sequential multiple assignment randomized trial. *Journal of the American Academy of Child & Adolescent Psychiatry*, 53(6), 635–646.  
<https://doi.org/10.1016/j.jaac.2014.01.019>
- Katz, J., Mirenda, P., & Auerbach, S. (2002). Instructional strategies and educational outcomes for students with developmental disabilities in inclusive “Multiple Intelligences” and typical inclusive classrooms. *Research and Practice for Persons with Severe Disabilities*, 27(4), 227–238. <https://doi.org/10.2511/rpsd.27.4.227>
- Kent-Walsh, J., Binger, C., & Hasham, Z. (2010). Effects of parent instruction on the symbolic communication of children using augmentative and alternative communication during storybook reading. *American Journal of Speech-Language Pathology*, 19, 97–107.  
[https://doi.org/10.1044/1058-0360\(2010/09-0014\)](https://doi.org/10.1044/1058-0360(2010/09-0014))
- Kent-Walsh, J., Binger, C., & Buchanan, C. (2015a). Teaching children who use augmentative and alternative communication to ask inverted yes-no questions using aided modeling. *American Journal of Speech-Language Pathology*, 24(2), 222–236.  
[https://doi.org/10.1044/2015\\_AJSLP-14-0066](https://doi.org/10.1044/2015_AJSLP-14-0066)
- Kent-Walsh, J., & Light, J. (2003). General education teachers’ experiences with inclusion of students who use augmentative and alternative communication. *Augmentative and Alternative Communication*, 19(2), 104–124.  
<https://doi.org/10.1080/0743461031000112043>
- Kent-Walsh, J. & McNaughton, D. (2005). Communication partner instruction in AAC: Present practices and future directions. *Augmentative and Alternative Communication* 21, 195–204.
- Kent-Walsh, J., Murza, K. A., Malani, M. D., & Binger, C. (2015b). Effects of communication partner instruction on the communication of individuals using AAC: A meta-analysis. *Augmentative and Alternative Communication*, 31(4), 1–14.  
<https://doi.org/10.3109/07434618.2015.1052153>

- Leech, E. R. B., & Cress, C. J. (2011). Indirect facilitation of speech in a late talking child by prompted production of picture symbols or signs. *Augmentative and Alternative Communication*, 27(1), 40–52. <https://doi.org/10.3109/07434618.2010.550062>
- Light, J., & Drager, K. (2007). AAC technologies for young children with complex communication needs: State of the science and future research directions. *Augmentative and Alternative Communication*, 23, 204–216. <https://doi.org/10.1080/07434610701553635>
- Light, J., & McNaughton, D. (2012). The changing face of augmentative and alternative communication: Past, present, and future challenges. *Augmentative and Alternative Communication*, 28(4), 197–204. <https://doi.org/10.3109/07434618.2012.737024>
- Light, J., & Mcnaughton, D. (2015). Designing AAC research and intervention to improve outcomes for individuals with complex communication needs. *Augmentative and Alternative Communication*, 31(2), 85–96. <https://doi.org/10.3109/07434618.2015.1036458>
- Lindo, E. J., & Elleman, A. M. (2010). Social validity's presence in field-based reading intervention research. *Remedial and Special Education*, 31(6), 489–499. <https://doi.org/10.1177/0741932510361249>
- Lüke, C. (2016). Impact of speech-generating devices on the language development of a child with childhood apraxia of speech: A case study. *Disability and Rehabilitation: Assistive Technology*, 11(1), 80–88. <https://doi.org/10.3109/17483107.2014.913715>
- Machalicek, W., O'Reilly, M., Chan, J. M., Lang, R., Rispoli, M., Davis, T., Shogren, K., Sigafoos, J., Lancioni, G., Antonucci, M., Langthorne, P., Andrews, A., & Didden, R. (2009). Using videoconferencing to conduct functional analysis of challenging behavior and develop classroom behavioral support plans for students with autism. *Education and Training in Developmental Disabilities*, 44(2), 207–217. <http://www.jstor.org/stable/24233495>
- Martin, J. H., Reichle, J., Dimian, A., & Chen, M. (2013). Communication modality sampling for a toddler with Angelman Syndrome. *Language, Speech, and Hearing Services in Schools*, 44(4), 327–336. [https://doi.org/10.1044/0161-1461\(2013/12-0108\)](https://doi.org/10.1044/0161-1461(2013/12-0108))
- Marturana, E. R., & Woods, J. J. (2012). Technology-supported performance-based feedback for early intervention home visiting. *Topics in Early Childhood Special Education*, 32(1), 14–23. <https://doi.org/10.1177/02711214111434935>
- Meder, A. M., & Wegner, J. R. (2015). iPads, mobile technologies, and communication applications: A survey of family wants, needs, and preferences. *Augmentative and Alternative Communication*, 31, 27–36. <https://doi.org/10.3109/07434618.2014.995223>
- Michnowicz, L. L., McConnell, S. R., Peterson, C. A., & Odom, S. L. (1995). Social Goals and Objectives of Preschool IEPs: A Content Analysis. *Journal of Early Intervention*, 19(4), 273–282. <https://doi.org/10.1177/105381519501900401>
- Millar, D. C., Light, J. C., & Schlosser, R. W. (2006). The Impact of augmentative and alternative communication intervention on the speech production of individuals with developmental disabilities: A Research Review. *Journal of Speech Language and Hearing Research*, 49(2), 248. [https://doi.org/10.1044/1092-4388\(2006/021\)](https://doi.org/10.1044/1092-4388(2006/021))
- Morin, K. L., Ganz, J. B., Gregori, E. V., Foster, M. J., Gerow, S. L., Genç-Tosun, D., & Hong, E. R. (2018). A systematic quality review of high-tech AAC interventions as an evidence-based practice. *Augmentative and Alternative Communication*, 34(2), 104–117. <https://doi.org/10.1080/07434618.2018.1458900>

- O'Brien, K. M., Brunsting, N. C., Bettini, E., Cumming, M. M., Ragunathan, M., & Sutton, R. (2019). Special educators' working conditions in self-contained settings for students with emotional or behavioral disorders: A descriptive analysis. *Exceptional Children*, 86(1), 40–57. <https://doi.org/10.1177/0014402919868946>
- O'Neill, T., Light, J., & Pope, L. (2018). Effects of interventions that include aided augmentative and alternative communication input on the communication of individuals with complex communication needs: A meta-analysis. *Journal of Speech, Language, and Hearing Research*, 61(7), 1743–1765. [https://doi.org/10.1044/2018\\_JSLHR-L-17-0132](https://doi.org/10.1044/2018_JSLHR-L-17-0132)
- Pickl, G. (2011). Communication intervention in children with severe disabilities and multilingual backgrounds: Perceptions of pedagogues and parents. *Augmentative and Alternative Communication*, 27, 229–244. <https://doi.org/10.3109/07434618.2011.630021>
- Poll, G. H. (2011). Increasing the odds: Applying emergentist theory in language intervention. *Language, Speech, and Hearing Services in Schools*, 42(4), 580–591. [https://doi.org/10.1044/0161-1461\(2011/10-0041\)](https://doi.org/10.1044/0161-1461(2011/10-0041))
- Quinn, E. & Rowland, C. (2017). Exploring expressive communication skills in a cross-sectional sample of children and young adults with Angelman syndrome. *American Journal of Speech-Language Pathology*, 26, 369–382. [https://doi.org/10.1044/2016\\_AJSLP-15-0075](https://doi.org/10.1044/2016_AJSLP-15-0075)
- Rispoli, M. J., Franco, J. H., Meer, L. van der, Lang, R., & Camargo, S. P. H. (2010). The use of speech generating devices in communication interventions for individuals with developmental disabilities: A review of the literature. *Developmental Neuropsychology*, 13(4), 276–293. <https://doi.org/10.3109/17518421003636794>
- Roberts, M. Y., & Kaiser, A. P. (2015). Early intervention for toddlers with language delays: A randomized controlled trial. *Pediatrics*, 135(4), 2014–2134. <https://doi.org/10.1542/peds.2014-2134>
- Roberts, M.Y., & Kaiser, A.P. (2011). The effectiveness of parent-implemented language interventions: A meta-analysis. *American Journal of Speech and Language Pathology*, 20, 180–199. [https://doi.org/10.1044/1058-0360\(2011/10-0055\)](https://doi.org/10.1044/1058-0360(2011/10-0055))
- Roberts, M. Y., Kaiser, A. P., Wolfe, C. E., Bryant, J. D., & Spidalieri, A. M. (2014). Effects of the teach-model-coach-review instructional approach on caregiver use of language support strategies and children's expressive language skills. *Journal of Speech, Language, and Hearing Research*, 57, 1851–1869. <https://doi.org/10.13023/ETD.2017.288>
- Romski, M., Sevcik, R. A., Adamson, L. B., Cheslock, M., Smith, A., Barker, R. M., & Bakeman, R. (2010). Randomized comparison of augmented and non-augmented language interventions for toddlers with developmental delays and their parents. *Journal of Speech, Language, and Hearing Research*, 53(2), 350–364. [https://doi.org/10.1044/1092-4388\(2009/08-0156](https://doi.org/10.1044/1092-4388(2009/08-0156)
- Romski, M., Sevcik, R. A., Barton-Hulsey, A., & Whitmore, A. S. (2015). Early intervention and AAC: What a difference 30 years makes. *Augmentative and Alternative Communication*, 31(3), 181–202. <https://doi.org/10.3109/07434618.2015.1064163>
- Rosa-Lugo, L. I., & Kent-Walsh, J. (2008). Effects of parent instruction on communicative turns of Latino children using augmentative and alternative communication during storybook reading. *Communication Disorders Quarterly*, 30(1), 49–61. <https://doi.org/10.1177/1525740108320353>

- Schlosser, R. W., & Wendt, O. (2008). Effects of augmentative and alternative communication intervention on speech production in children with autism: A systematic review. *American Journal of Speech-Language Pathology*, 17, 212-220. [https://doi.org/10.1044/1058-0360\(2008/021\)](https://doi.org/10.1044/1058-0360(2008/021)).
- Sennott, S. C., Light, J. C., & McNaughton, D. (2016). AAC modeling intervention research review. *Research and Practice for Persons with Severe Disabilities*, 41(2), 101-115. <https://doi.org/10.1177/1540796916638822>
- Sevcik, R., Ronski, M., & Adamson, L. (2004). Research directions in augmentative and alternative communication for preschool children. *Disability and Rehabilitation*, 26(21-22), 1323-1329. <https://doi.org/10.1080/09638280412331280352>
- Sievers, S. B., Trembath, D., & Westerveld, M. (2018). A systematic review of predictors, moderators, and mediators of augmentative and alternative communication (AAC) outcomes for children with autism spectrum disorder. *Augmentative and Alternative Communication*, 0(0), 1-11. <https://doi.org/10.1080/07434618.2018.1462849>
- Solomon-Rice, P. L., & Soto, G. (2014). Facilitating vocabulary in toddlers using AAC a preliminary study comparing focused stimulation and augmented input. *Communication Disorders Quarterly*, 35, 204-215. <https://doi.org/10.1177/1525740114522856>
- Soto, G., Müller, E., Hunt, P., & Goetz, L. (2001). Professional skills for serving students who use AAC in general education classrooms: A team perspective. *Language Speech and Hearing Services in Schools*, 32(1), 51. [https://doi.org/10.1044/0161-1461\(2001/005\)](https://doi.org/10.1044/0161-1461(2001/005))
- Soto, G. & Zangari, C. (2009). *Practically speaking: language, literacy, & academic development for students with AAC needs*. Brookes.
- Taylor, R., & Iacono, T. (2003). AAC and scripting activities to facilitate communication and play. *Advances in Speech Language Pathology*, 5(2), 79-93. <https://doi.org/10.1080/14417040510001669111>
- Therrien, M. C. S., & Light, J. (2016). Using the iPad to facilitate interaction between preschool children who use AAC and their peers. *Augmentative and Alternative Communication*, 32(3), 163-174. <https://doi.org/10.1080/07434618.2016.1205133>
- Therrien, M. C. S., Light, J., & Pope, L. (2016). Systematic review of the effects of interventions to promote peer interactions for children who use aided AAC. *Augmentative and Alternative Communication*, 32(2), 81-93. <https://doi.org/10.3109/07434618.2016.1146331>
- Thomas-Stonell, N., Robertson, B., Oddson, B., & Rosenbaum, P. (2016). Communicative participation changes in pre-school children receiving augmentative and alternative communication intervention. *International Journal of Speech-Language Pathology*, 18(1), 32-40. <https://doi.org/10.3109/17549507.2015.1060530>
- Tönsing, K. M., Dada, S., & Alant, E. (2014). Teaching graphic symbol combinations to children with limited speech during shared story reading. *Augmentative and Alternative Communication*, 30, 279-297. <https://doi.org/10.3109/07434618.2014.965846>
- Van der Schuit, M., Segers, E., van Balkom, H., Stoep, J., & Verhoeven, L. (2010). Immersive communication intervention for speaking and non-speaking children with intellectual disabilities. *Augmentative and Alternative Communication*, 26(3), 203-218. <https://doi.org/10.3109/07434618.2010.505609>
- Walker, V. L., Lyon, K. J., Loman, S. L., & Sennott, S. (2018). A systematic review of Functional Communication Training (FCT) interventions involving augmentative and alternative



communication in school settings. *Augmentative and Alternative Communication*, 34(2), 118–129. <https://doi.org/10.1080/07434618.2018.1461240>

Walker, V. L., & Snell, M. E. (2013). Effects of augmentative and alternative communication on challenging behavior: A meta-analysis. *Augmentative and Alternative Communication*, 29(2), 117–131. <https://doi.org/10.3109/07434618.2013.785020>

Wright, C. A., Kaiser, A. P., Reikowsky, D. I., & Roberts, M. Y. (2013). Effects of a naturalistic sign intervention on expressive language of toddlers with down syndrome. *Journal of Speech, Language and Hearing Research (Online)*, 56(3), 994–1008. [https://doi.org/10.1044/1092-4388\(2012/12-0060\)](https://doi.org/10.1044/1092-4388(2012/12-0060))

## SECTION 2: IMPLEMENTATION SCIENCE RESEARCH

Bauer, M. S., Damschroder, L., Hagedorn, H., Smith, J., & Kilbourne, A. M. (2015). An introduction to implementation science for the non-specialist. *BMC Psychology*, 3(1). <https://doi.org/10.1186/s40359-015-0089-9>

Benedict, E. A., Horner, R. H., & Squires, J. K. (2007). Assessment and implementation of positive behavior support in preschools. *Topics in Early Childhood Special Education*, 27(3), 174–192. <https://doi.org/10.1177/02711214070270030801>

Blase, K. A., Fixsen, D. L., Sims, B. J., & Ward, C. S. (2015). *Implementation science: Changing hearts, minds, behavior, and systems to improve educational outcomes*. The Wing Institute.

Buyse, V., Sparkman, K. L., & Wesley, P. W. (2003). Communities of practice: Connecting what we know with what we do. *Exceptional Children*, 69(3), 263–278. <https://doi.org/10.1177/001440290306900301>

Buyse, V., Wesley, P., & Skinner, D. (1999). Community development approaches for early intervention. *Topics in Early Childhood Special Education*, 19(4), 236–243. <https://doi.org/10.1177/027112149901900404>

Campbell, P. H., & Halbert, J. (2002). Between research and practice: Provider perspectives on early intervention. *Topics in Early Childhood Special Education*, 22(4), 213–226. <https://doi.org/10.1177/027112140202200403>

Campbell, P. H., & Sawyer, L. B. (2009). Changing early intervention providers' home visiting skills through participation in professional development. *Topics in Early Childhood Special Education*, 28(4), 219–234. <https://doi.org/10.1177/0271121408328481>

Carroll, C., Patterson, M., Wood, S., Booth, A., Rick, J., & Balain, S. (2007). A conceptual framework for implementation fidelity. *Implementation Science*, 2(40). <https://doi.org/10.1186/1748-5908-2-40>

Cook, B. G., Cook, L., & Landrum, T. J. (2013). Moving research into practice: Can we make dissemination stick? *Exceptional Children*, 79(2), 163–180. <https://doi.org/10.1177/001440291307900203>

Cook, B. G., & Odom, S. L. (2013). Evidence-based practices and implementation science in special education. *Exceptional Children*, 79(2), 135–144. <https://doi.org/10.1177/001440291307900201>

Durlak, J. A., & DuPre, E. P. (2008). Implementation matters: A review of research on the influence of implementation on program outcomes and the factors affecting

- implementation. *American Journal of Community Psychology*, 41(3–4), 327–350.  
<https://doi.org/10.1007/s10464-008-9165-0>
- Eccles, M. P., & Mittman, B. S. (2006). Welcome to implementation science. *Implementation Science*, 1, 1. <https://doi.org/10.1186/1748-5908-1-1>
- Escoffery, C., Lebow-Skelley, E., Haardoerfer, R., Boing, E., Udelson, H., Wood, R., Hartman, M., Fernandez, M. E., & Mullen, P. D. (2018). A systematic review of adaptations of evidence-based public health interventions globally. *Implementation Science*, 13. <https://doi.org/10.1186/s13012-018-0815-9>
- Escoffery, C., Lebow-Skelley, E., Udelson, H., Böing, E. A., Wood, R., Fernandez, M. E., & Mullen, P. D. (2018). A scoping study of frameworks for adapting public health evidence-based interventions. *Translational Behavioral Medicine*, 9(1), 1–10. <https://doi.org/10.1093/tbm/ibx067>
- Fixsen, D., Blase, K., Metz, A., & Dyke, M. V. (2013). Statewide implementation of evidence-based programs. *Exceptional Children*, 79(2), 213–230. <https://doi.org/10.1177/001440291307900206>
- Fixsen, D. L., Blasé, K. A., Timbers, G. D., & Wolf, M. M. (2007). In search of program implementation: 792 replications of the Teaching-Family Model. *The Behavior Analyst Today*, 8(1), 96–110. <https://doi.org/10.1037/h0100104>
- Fixen, D., Naoom, S., Blase, K., Friedman, R., & Wallace, F. (2005). *Implementation research: A synthesis of the literature*. University of South Florida, Louis de la Parte Florida Mental Health Institute, National Implementation Research Network. <https://nirn.fpg.unc.edu/sites/nirn.fpg.unc.edu/files/resources/NIRN-MonographFull-01-2005.pdf>
- Greenwood, C. R., & Abbott, M. (2001). The research to practice gap in special education. *Teacher Education and Special Education: The Journal of the Teacher Education Division of the Council for Exceptional Children*, 24(4), 276–289. <https://doi.org/10.1177/088840640102400403>
- Hamby, S., & Grych, J. (2013). Evidence-based interventions need to be more systematic, not more disruptive. *American Psychologist*, 68(6), 476–477. <https://doi.org/10.1037/a0032884>
- Harn, B., Parisi, D., & Stoolmiller, M. (2013). Balancing fidelity with flexibility and fit: What do we really know about fidelity of implementation in schools?. *Exceptional Children*, 79(2), 181–193. <https://doi.org/10.1177/001440291307900204>
- Klingner, J. K., Boardman, A. G., & McMaster, K. L. (2013). What does it take to scale up and sustain evidence-based practices? *Exceptional Children*, 79(2), 195–211. <https://doi.org/10.1177/001440291307900205>
- Knoche, L. L., Sheridan, S. M., Edwards, C. P., & Osborn, A. Q. (2010). Implementation of a relationship-based school readiness intervention: A multidimensional approach to fidelity measurement for early childhood. *Early Childhood Research Quarterly*, 25(3), 299–313. <https://doi.org/10.1016/j.ecresq.2009.05.003>
- Metz, A., Naoom, S.F., Halle, T., & Bartley, L. (2015). *An integrated stage-based framework for implementation of early childhood programs and systems* (OPRE Research Brief OPRE 2015-48). Office of Planning, Research and Evaluation, Administration for Children and Families, U.S. Department of Health and Human Services.

[https://nirn.fpg.unc.edu/sites/nirn.fpg.unc.edu/files/resources/OPRE-stage\\_based\\_framework\\_brief\\_508.pdf](https://nirn.fpg.unc.edu/sites/nirn.fpg.unc.edu/files/resources/OPRE-stage_based_framework_brief_508.pdf)

- O'Connor, S., & Pettigrew, C. M. (2009). The barriers perceived to prevent the successful implementation of evidence-based practice by speech and language therapists. *International Journal of Language & Communication Disorders*, 44(6), 1018–1035. <https://doi.org/10.1080/13682820802585967>
- Odom, S. L., Cox, A. W., & Brock, M. E. (2013). Implementation science, professional development, and Autism spectrum disorders. *Exceptional Children*, 79(2), 233–251. <https://doi.org/10.1177/001440291307900207>
- Olswang, L. B., & Prelock, P. A. (2015). Bridging the gap between research and practice: Implementation science. *Journal of Speech, Language, and Hearing Research*, 58(6), S1818–S1826. [https://doi.org/10.1044/2015\\_JSLHR-L-14-0305](https://doi.org/10.1044/2015_JSLHR-L-14-0305)
- Proctor, E. K., Powell, B. J., & McMillen, J. C. (2013). Implementation strategies: Recommendations for specifying and reporting. *Implementation Science: IS*, 8, 139. <https://doi.org/10.1186/1748-5908-8-139>
- Proctor, E., Silmere, H., Raghavan, R., Hovmand, P., Aarons, G., Bunger, A., Griffey, R., & Hensley, M. (2011). Outcomes for implementation research: Conceptual distinctions, measurement challenges, and research agenda. *Administration and Policy in Mental Health*, 38(2), 65–76. <https://doi.org/10.1007/s10488-010-0319-7>
- Redle, E. E. *Improving Practice Through Implementation Science and Knowledge Translation*. (2013, November). American Speech-Language-Hearing Association. Retrieved April 8, 2015, from [http://www.asha.org/academic/questions/improving-practice-through-implementation-science-and-knowledge-translation/#\\_ga=1.216691734.1697793527.1418760666](http://www.asha.org/academic/questions/improving-practice-through-implementation-science-and-knowledge-translation/#_ga=1.216691734.1697793527.1418760666)
- Smith, G. J., Schmidt, M. M., Edelen-Smith, P. J., & Cook, B. G. (2013). Pasteur's quadrant as the bridge linking rigor with relevance. *Exceptional Children*, 79(2), 147–161. <https://doi.org/10.1177/001440291307900202>
- Tabak, R. G., Khoong, E. C., Chambers, D. A., & Brownson, R. C. (2012). Bridging research and practice: Models for dissemination and implementation research. *American Journal of Preventive Medicine*, 43(3), 337–350. <https://doi.org/10.1016/j.amepre.2012.05.024>
- Vismara, L. A., Young, G. S., & Rogers, S. J. (2013). Community dissemination of the early start denver model implications for science and practice. *Topics in Early Childhood Special Education*, 32(4), 223–233. <https://doi.org/10.1177/0271121411409250>
- Wesley, P. W., & Buysse, V. (2001). Communities of practice expanding professional roles to promote reflection and shared inquiry. *Topics in Early Childhood Special Education*, 21(2), 114–123. <https://doi.org/10.1177/027112140102100205>
- Zipoli, R. P., & Kennedy, M. (2005). Evidence-based practice among speech-language pathologists: Attitudes, utilization, and barriers. *American Journal of Speech-Language Pathology*, 14(3), 208–220. [https://doi.org/10.1044/1058-0360\(2005/021\)](https://doi.org/10.1044/1058-0360(2005/021))
